# Supplementary material
Source: PubMed Central journal article supplement (PMC3729351)
Supplement: NIHMS365774-supplement-1_si_001.pdf [file NIHMS365774-supplement-1_si_001.pdf]

# Supplementary Information for: Simple liquid models with corrected dielectric constants

Christopher J. Fennell\*, Libo Li, and Ken A. Dill

*Laufer Center for Physical and Quantitative Biology, Stony Brook University, Stony Brook, NY 11794*

\* Corresponding author. Electronic address: cfennell@gmail.com

## SI 1 Structure comparison of chloromethane models

Fig. 1 shows a radial distribution function comparison between the flexible Fox & Kollman  $\text{CCl}_4$  solvent model and the  $\text{CCl}_4$ -DC model with a single embedded dipole. In order to embed the dipole and match the experimental density, the diameters of the atom LJ parameters are larger than those of the flexible model. This results in a broader and shorter first-shell peak as discussed in the main text. If a narrower and more intense first-shell peak is desired, one could use an alternate to the LJ potential with a steeper repulsive term and correspondingly narrower attractive well. Such a change would also reduce the temperature dependence of volumetric expansion.

Figs. 2 and 3 show Cl-Cl radial distribution function comparisons between the united-atom  $\text{CHCl}_3$ -DC and  $\text{CH}_2\text{Cl}_2$ -DC models and their all-atom Fox & Kollman counterparts. Structural comparisons between united-atom and all-atom models are qualitative given the geometric distortions involved in making a united atom site as discussed in the main text, and the Cl-Cl packing is possibly the least perturbed. These plots illustrate the consequence of enhanced polarization of the dipole moment of a given model – the first solvation shell peaks are slightly more intense, indicating a more structured liquid. This intensity naturally dampens out at further separation distances as the fluid reaches bulk density behavior.

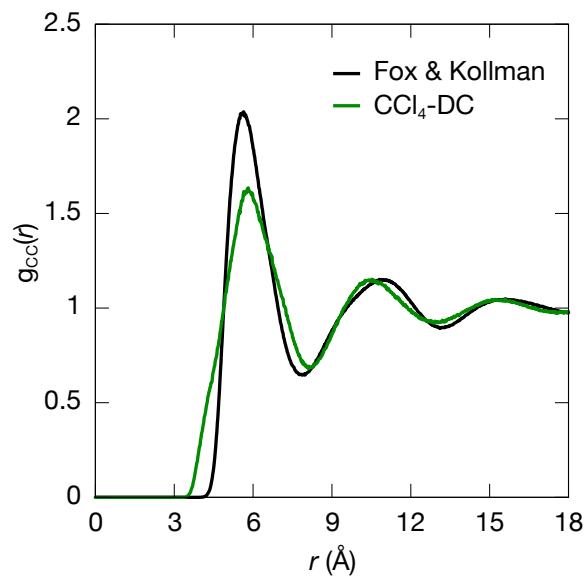

Figure 1: The C-C radial distribution function for the flexible Fox & Kollman  $\text{CCl}_4$  and the localized dipole  $\text{CCl}_4$ -DC model.

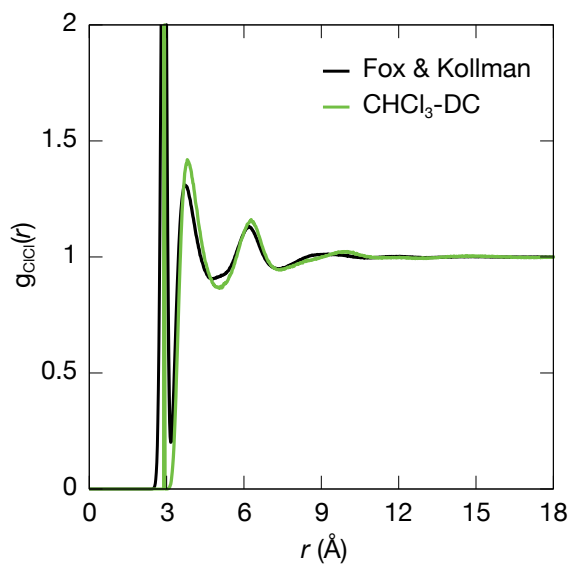

Figure 2: The Cl-Cl radial distribution function for the flexible Fox & Kollman  $\text{CHCl}_3$  and  $\text{CHCl}_3$ -DC model.

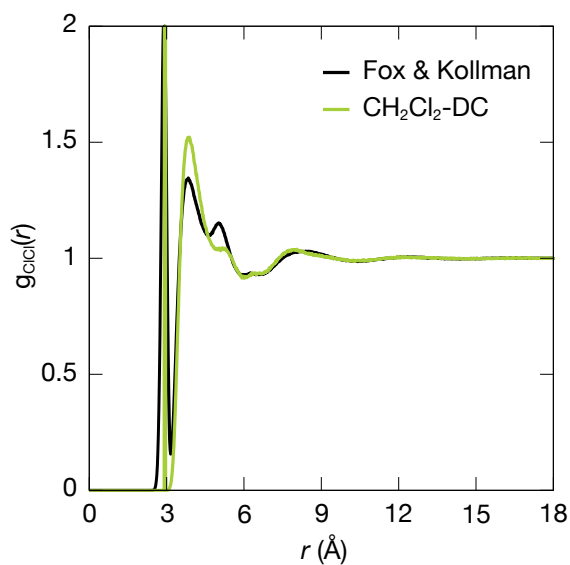

Figure 3: The Cl-Cl radial distribution function for the flexible Fox & Kollman  $\text{CH}_2\text{Cl}_2$  and  $\text{CH}_2\text{Cl}_2$ -DC model.

## SI 2 Temperature Dependent Property Data for Chloromethane Models

Tables 1, 2, 3, and 4 list the investigated properties as a function of temperature for the  $\text{CCl}_4$  (localized and distributed dipole),  $\text{CHCl}_3$ , and  $\text{CH}_2\text{Cl}_2$  models respectively.

## SI 3 Temperature Dependent Property Data for Water Models

Tables 5, 6, 7, and 8 list the investigated properties as a function of temperature for the SPC, SPC/E, SPC/DC, and  $\text{H}_2\text{O}$ -DC water models respectively.

Table 1: Temperature dependent property data for the localized dipole  $\text{CCl}_4$ -DC model with standard error of the last digit in parentheses

| Temperature<br>(K) | $\rho$<br>( $\text{kg/m}^3$ ) | $\Delta H_{\text{vap}}$<br>(kJ/mol) | $\varepsilon(0)$ | $C_p$<br>(J/mol·K) | $\kappa_T$<br>( $10^5 \text{ atm}^{-1}$ ) | $\alpha_p$<br>( $10^6 \text{ K}^{-1}$ ) | $D$<br>( $10^{-9} \text{ m}^2/\text{s}$ ) |
|--------------------|-------------------------------|-------------------------------------|------------------|--------------------|-------------------------------------------|-----------------------------------------|-------------------------------------------|
| 253.15             | 1,718.86 (5)                  | 38.287 (3)                          | 2.30 (1)         | 140 (3)            | 82 (2)                                    | 170 (5)                                 | 0.53 (1)                                  |
| 258.15             | 1,705.8 (1)                   | 37.669 (4)                          | 2.29 (1)         | 141 (1)            | 86 (1)                                    | 173 (2)                                 | 0.62 (1)                                  |
| 263.15             | 1,692.2 (1)                   | 37.041 (3)                          | 2.285 (8)        | 144 (1)            | 91 (1)                                    | 178 (2)                                 | 0.66 (1)                                  |
| 268.15             | 1,678.3 (1)                   | 36.400 (4)                          | 2.27 (1)         | 147 (2)            | 98 (2)                                    | 188 (4)                                 | 0.71 (1)                                  |
| 273.15             | 1,664.2 (1)                   | 35.750 (5)                          | 2.27 (1)         | 146 (3)            | 100 (3)                                   | 185 (5)                                 | 0.80 (1)                                  |
| 278.15             | 1,649.63 (4)                  | 35.095 (1)                          | 2.232 (8)        | 152 (3)            | 111 (2)                                   | 200 (4)                                 | 0.85 (2)                                  |
| 283.15             | 1,634.7 (1)                   | 34.427 (4)                          | 2.224 (6)        | 154 (2)            | 118 (2)                                   | 207 (4)                                 | 0.99 (1)                                  |
| 288.15             | 1,619.7 (1)                   | 33.754 (3)                          | 2.21 (1)         | 156 (1)            | 127 (1)                                   | 214 (3)                                 | 1.06 (2)                                  |
| 293.15             | 1,604.62 (8)                  | 33.084 (3)                          | 2.197 (4)        | 155 (2)            | 130 (2)                                   | 215 (3)                                 | 1.17 (1)                                  |
| 298.15             | 1,588.7 (1)                   | 32.392 (4)                          | 2.202 (6)        | 154 (2)            | 134 (2)                                   | 213 (4)                                 | 1.24 (1)                                  |
| 303.15             | 1,573.2 (1)                   | 31.711 (7)                          | 2.170 (6)        | 155 (2)            | 147 (2)                                   | 223 (4)                                 | 1.34 (1)                                  |
| 308.15             | 1,557.4 (1)                   | 31.026 (5)                          | 2.16 (1)         | 153 (3)            | 151 (4)                                   | 222 (5)                                 | 1.42 (3)                                  |
| 313.15             | 1,541.8 (1)                   | 30.348 (5)                          | 2.139 (7)        | 157 (2)            | 161 (2)                                   | 230 (4)                                 | 1.56 (3)                                  |
| 318.15             | 1,526.02 (9)                  | 29.670 (4)                          | 2.128 (8)        | 154 (3)            | 168 (4)                                   | 230 (5)                                 | 1.75 (2)                                  |
| 323.15             | 1,510.2 (1)                   | 28.994 (4)                          | 2.11 (1)         | 156 (1)            | 179 (1)                                   | 236 (2)                                 | 1.84 (2)                                  |
| 328.15             | 1,494.4 (1)                   | 28.321 (5)                          | 2.10 (1)         | 157 (2)            | 192 (5)                                   | 244 (6)                                 | 1.95 (7)                                  |
| 333.15             | 1,478.9 (2)                   | 27.661 (6)                          | 2.075 (4)        | 151 (2)            | 194 (2)                                   | 235 (3)                                 | 2.16 (3)                                  |
| 338.15             | 1,463.3 (2)                   | 27.006 (6)                          | 2.072 (7)        | 155 (3)            | 214 (6)                                   | 250 (6)                                 | 2.25 (5)                                  |
| 343.15             | 1,447.80 (9)                  | 26.351 (3)                          | 2.07 (2)         | 151 (2)            | 218 (5)                                   | 245 (5)                                 | 2.41 (4)                                  |
| 348.15             | 1,432.5 (1)                   | 25.708 (5)                          | 2.034 (9)        | 150 (1)            | 230 (4)                                   | 249 (4)                                 | 2.63 (3)                                  |
| 353.15             | 1,417.6 (1)                   | 25.081 (4)                          | 2.03 (1)         | 145 (2)            | 233 (4)                                   | 240 (5)                                 | 2.76 (8)                                  |
| 358.15             | 1,402.8 (2)                   | 24.460 (5)                          | 2.018 (7)        | 147 (2)            | 252 (4)                                   | 250 (4)                                 | 3.01 (6)                                  |
| 363.15             | 1,388.30 (8)                  | 23.858 (4)                          | 1.995 (5)        | 147 (4)            | 265 (8)                                   | 254 (9)                                 | 3.13 (4)                                  |
| 368.15             | 1,373.85 (8)                  | 23.254 (2)                          | 1.991 (8)        | 142 (4)            | 269 (0)                                   | 248 (9)                                 | 3.31 (3)                                  |
| 373.15             | 1,359.6 (1)                   | 22.666 (4)                          | 1.969 (4)        | 140 (2)            | 280 (4)                                   | 247 (4)                                 | 3.56 (5)                                  |

Table 2: Temperature dependent property data for the localized dipole  $\text{CCl}_4$ -DC model with standard error of the last digit in parentheses

| Temperature<br>(K) | $\rho$<br>( $\text{kg/m}^3$ ) | $\Delta H_{\text{vap}}$<br>(kJ/mol) | $\varepsilon(0)$ | $C_p$<br>(J/mol·K) | $\kappa_T$<br>( $10^5 \text{ atm}^{-1}$ ) | $\alpha_p$<br>( $10^6 \text{ K}^{-1}$ ) | $D$<br>( $10^{-9} \text{ m}^2/\text{s}$ ) |
|--------------------|-------------------------------|-------------------------------------|------------------|--------------------|-------------------------------------------|-----------------------------------------|-------------------------------------------|
| 253.15             | 1,718.55 (1)                  | 38.325 (2)                          | 2.33 (1)         | 140 (3)            | 82 (1)                                    | 170 (4)                                 | 0.56 (1)                                  |
| 258.15             | 1,705.45 (7)                  | 37.703 (4)                          | 2.313 (6)        | 143 (1)            | 86 (1)                                    | 175 (2)                                 | 0.60 (1)                                  |
| 263.15             | 1,691.88 (7)                  | 37.067 (3)                          | 2.30 (1)         | 146 (2)            | 92 (2)                                    | 182 (3)                                 | 0.66 (1)                                  |
| 268.15             | 1,678.16 (4)                  | 36.431 (2)                          | 2.26 (1)         | 147 (3)            | 96 (2)                                    | 185 (4)                                 | 0.73 (1)                                  |
| 273.15             | 1,663.9 (1)                   | 35.776 (6)                          | 2.252 (7)        | 147 (1)            | 102 (2)                                   | 191 (3)                                 | 0.81 (2)                                  |
| 278.15             | 1,649.4 (1)                   | 35.115 (3)                          | 2.210 (8)        | 153 (2)            | 110 (2)                                   | 201 (4)                                 | 0.88 (3)                                  |
| 283.15             | 1,634.7 (1)                   | 34.451 (5)                          | 2.177 (6)        | 152 (3)            | 115 (1)                                   | 202 (4)                                 | 0.97 (2)                                  |
| 288.15             | 1,619.4 (2)                   | 33.765 (5)                          | 2.168 (7)        | 156 (1)            | 124.7 (9)                                 | 212 (2)                                 | 1.06 (2)                                  |
| 293.15             | 1,604.34 (4)                  | 33.093 (3)                          | 2.148 (9)        | 154 (1)            | 130 (2)                                   | 213 (2)                                 | 1.13 (1)                                  |
| 298.15             | 1,588.77 (7)                  | 32.406 (1)                          | 2.112 (8)        | 156 (2)            | 137 (2)                                   | 219 (4)                                 | 1.26 (2)                                  |
| 303.15             | 1,573.0 (1)                   | 31.719 (6)                          | 2.096 (4)        | 159 (2)            | 154 (3)                                   | 233 (4)                                 | 1.36 (3)                                  |
| 308.15             | 1,557.34 (6)                  | 31.033 (2)                          | 2.06 (1)         | 156 (2)            | 151 (3)                                   | 224 (5)                                 | 1.47 (2)                                  |
| 313.15             | 1,541.29 (3)                  | 30.340 (2)                          | 2.062 (8)        | 156 (3)            | 161 (4)                                   | 229 (6)                                 | 1.65 (3)                                  |
| 318.15             | 1,525.59 (4)                  | 29.662 (2)                          | 2.038 (1)        | 156 (3)            | 172 (4)                                   | 235 (5)                                 | 1.68 (3)                                  |
| 323.15             | 1,509.7 (1)                   | 28.981 (5)                          | 2.016 (4)        | 158 (2)            | 182 (2)                                   | 240 (3)                                 | 1.84 (3)                                  |
| 328.15             | 1,494.0 (2)                   | 28.306 (6)                          | 1.985 (9)        | 158 (2)            | 192 (3)                                   | 245 (4)                                 | 2.05 (2)                                  |
| 333.15             | 1,478.15 (6)                  | 27.630 (4)                          | 1.973 (7)        | 155 (2)            | 201 (4)                                   | 244 (4)                                 | 2.08 (5)                                  |
| 338.15             | 1,462.8 (2)                   | 26.979 (4)                          | 1.956 (6)        | 154 (3)            | 208 (5)                                   | 244 (6)                                 | 2.27 (7)                                  |
| 343.15             | 1,447.3 (1)                   | 26.324 (4)                          | 1.926 (7)        | 152 (4)            | 220 (7)                                   | 247 (8)                                 | 2.42 (5)                                  |
| 348.15             | 1,432.0 (1)                   | 25.684 (6)                          | 1.916 (8)        | 148 (3)            | 225 (5)                                   | 243 (6)                                 | 2.59 (5)                                  |
| 353.15             | 1,416.9 (1)                   | 25.047 (4)                          | 1.896 (7)        | 152 (3)            | 247 (9)                                   | 256 (9)                                 | 2.89 (4)                                  |
| 358.15             | 1,402.0 (1)                   | 24.418 (5)                          | 1.870 (5)        | 146 (5)            | 244 (1)                                   | 243 (1)                                 | 2.86 (5)                                  |
| 363.15             | 1,387.0 (1)                   | 23.798 (3)                          | 1.849 (8)        | 150 (3)            | 270 (6)                                   | 260 (6)                                 | 3.17 (4)                                  |
| 368.15             | 1,372.50 (8)                  | 23.195 (3)                          | 1.834 (6)        | 145 (2)            | 275 (4)                                   | 254 (4)                                 | 3.37 (7)                                  |
| 373.15             | 1,358.5 (1)                   | 22.608 (5)                          | 1.818 (7)        | 140 (4)            | 277 (2)                                   | 245 (0)                                 | 3.37 (4)                                  |

Table 3: Temperature dependent property data for the united-atom  $\text{CHCl}_3$ -DC model with standard error of the last digit in parentheses

| Temperature<br>(K) | $\rho$<br>( $\text{kg/m}^3$ ) | $\Delta H_{\text{vap}}$<br>(kJ/mol) | $\varepsilon(0)$ | $C_p$<br>(J/mol·K) | $\kappa_T$<br>( $10^5 \text{ atm}^{-1}$ ) | $\alpha_p$<br>( $10^6 \text{ K}^{-1}$ ) | $D$<br>( $10^{-9} \text{ m}^2/\text{s}$ ) |
|--------------------|-------------------------------|-------------------------------------|------------------|--------------------|-------------------------------------------|-----------------------------------------|-------------------------------------------|
| 253.15             | 1,535.12 (4)                  | 34.419 (1)                          | 5.19 (5)         | 85 (1)             | 58 (1)                                    | 106 (2)                                 | 0.76 (1)                                  |
| 258.15             | 1,527.99 (7)                  | 34.054 (2)                          | 5.17 (7)         | 87 (1)             | 60 (1)                                    | 109 (2)                                 | 0.82 (2)                                  |
| 263.15             | 1,520.94 (3)                  | 33.699 (2)                          | 5.18 (3)         | 87 (2)             | 63.7 (3)                                  | 112 (3)                                 | 0.90 (2)                                  |
| 268.15             | 1,513.88 (5)                  | 33.340 (2)                          | 5.07 (5)         | 84 (2)             | 64.4 (6)                                  | 110 (3)                                 | 0.99 (4)                                  |
| 273.15             | 1,506.68 (5)                  | 32.980 (2)                          | 5.05 (6)         | 86 (1)             | 67 (2)                                    | 113 (4)                                 | 1.04 (2)                                  |
| 278.15             | 1,499.7 (1)                   | 32.632 (2)                          | 4.99 (2)         | 85 (1)             | 68.3 (4)                                  | 112 (2)                                 | 1.12 (2)                                  |
| 283.15             | 1,492.43 (4)                  | 32.272 (2)                          | 4.83 (2)         | 84.3 (7)           | 70.6 (0)                                  | 112 (2)                                 | 1.21 (1)                                  |
| 288.15             | 1,485.43 (5)                  | 31.924 (1)                          | 4.86 (4)         | 86 (1)             | 74 (1)                                    | 117 (3)                                 | 1.30 (2)                                  |
| 293.15             | 1,478.31 (5)                  | 31.573 (1)                          | 4.81 (3)         | 89 (2)             | 80 (3)                                    | 123 (5)                                 | 1.44 (2)                                  |
| 298.15             | 1,471.16 (7)                  | 31.222 (4)                          | 4.77 (3)         | 85 (1)             | 78 (1)                                    | 116 (2)                                 | 1.48 (1)                                  |
| 303.15             | 1,464.02 (8)                  | 30.875 (2)                          | 4.75 (3)         | 84.5 (9)           | 81 (1)                                    | 117 (2)                                 | 1.54 (2)                                  |
| 308.15             | 1,456.81 (5)                  | 30.522 (2)                          | 4.67 (2)         | 86 (1)             | 85 (2)                                    | 121 (3)                                 | 1.64 (2)                                  |
| 313.15             | 1,449.61 (5)                  | 30.177 (2)                          | 4.56 (2)         | 84 (2)             | 85 (2)                                    | 117 (3)                                 | 1.85 (2)                                  |
| 318.15             | 1,442.31 (6)                  | 29.831 (3)                          | 4.56 (3)         | 86 (2)             | 91 (2)                                    | 123 (3)                                 | 1.81 (5)                                  |
| 323.15             | 1,435.0 (0)                   | 29.487 (1)                          | 4.51 (3)         | 86 (1)             | 94 (1)                                    | 124 (2)                                 | 2.07 (3)                                  |
| 328.15             | 1,427.85 (4)                  | 29.141 (2)                          | 4.51 (3)         | 85 (1)             | 95.4 (5)                                  | 122 (2)                                 | 2.14 (5)                                  |
| 333.15             | 1,420.54 (7)                  | 28.800 (4)                          | 4.45 (3)         | 84 (1)             | 99 (3)                                    | 125 (4)                                 | 2.20 (3)                                  |
| 338.15             | 1,413.15 (6)                  | 28.452 (3)                          | 4.44 (3)         | 85 (1)             | 106 (2)                                   | 129 (2)                                 | 2.33 (3)                                  |
| 343.15             | 1,405.86 (9)                  | 28.114 (3)                          | 4.34 (3)         | 86 (1)             | 108 (3)                                   | 130 (4)                                 | 2.54 (5)                                  |
| 348.15             | 1,398.46 (6)                  | 27.771 (2)                          | 4.35 (4)         | 85.7 (5)           | 113 (2)                                   | 131 (2)                                 | 2.65 (5)                                  |
| 353.15             | 1,390.93 (4)                  | 27.425 (2)                          | 4.26 (2)         | 86 (1)             | 119 (2)                                   | 135 (3)                                 | 2.82 (7)                                  |
| 358.15             | 1,383.50 (9)                  | 27.085 (2)                          | 4.23 (3)         | 86.9 (6)           | 122 (1)                                   | 136 (2)                                 | 2.87 (5)                                  |
| 363.15             | 1,376.11 (0)                  | 26.749 (3)                          | 4.15 (1)         | 84.9 (8)           | 123 (2)                                   | 134 (2)                                 | 3.09 (3)                                  |
| 368.15             | 1,368.57 (4)                  | 26.402 (2)                          | 4.21 (2)         | 82 (1)             | 119 (3)                                   | 126 (3)                                 | 3.2 (1)                                   |
| 373.15             | 1,360.83 (4)                  | 26.061 (2)                          | 4.14 (2)         | 86 (2)             | 134 (3)                                   | 139 (3)                                 | 3.40 (5)                                  |

Table 4: Temperature dependent property data for the united-atom CH<sub>2</sub>Cl<sub>2</sub>-DC model with standard error of the last digit in parentheses

| Temperature<br>(K) | $\rho$<br>(kg/m <sup>3</sup> ) | $\Delta H_{\text{vap}}$<br>(kJ/mol) | $\varepsilon(0)$ | $C_p$<br>(J/mol·K) | $\kappa_T$<br>(10 <sup>5</sup> atm <sup>-1</sup> ) | $\alpha_p$<br>(10 <sup>6</sup> K <sup>-1</sup> ) | $D$<br>(10 <sup>-9</sup> m <sup>2</sup> /s) |
|--------------------|--------------------------------|-------------------------------------|------------------|--------------------|----------------------------------------------------|--------------------------------------------------|---------------------------------------------|
| 253.15             | 1,374.57 (4)                   | 31.733 (2)                          | 9.93 (8)         | 91.0 (9)           | 72 (1)                                             | 144 (2)                                          | 1.15 (2)                                    |
| 258.15             | 1,368.16 (5)                   | 31.395 (2)                          | 9.89 (0)         | 94 (1)             | 78 (2)                                             | 152 (4)                                          | 1.25 (2)                                    |
| 263.15             | 1,361.76 (6)                   | 31.060 (4)                          | 9.67 (7)         | 91.5 (6)           | 76 (2)                                             | 146 (3)                                          | 1.32 (2)                                    |
| 268.15             | 1,355.30 (3)                   | 30.725 (2)                          | 9.58 (6)         | 91 (1)             | 80 (2)                                             | 148 (3)                                          | 1.47 (3)                                    |
| 273.15             | 1,348.76 (3)                   | 30.389 (2)                          | 9.4 (1)          | 92 (2)             | 84 (2)                                             | 153 (4)                                          | 1.54 (3)                                    |
| 278.15             | 1,342.40 (2)                   | 30.063 (1)                          | 9.30 (7)         | 92 (1)             | 84 (3)                                             | 149 (5)                                          | 1.67 (5)                                    |
| 283.15             | 1,335.88 (6)                   | 29.729 (3)                          | 9.25 (5)         | 92 (1)             | 91 (3)                                             | 156 (5)                                          | 1.80 (3)                                    |
| 288.15             | 1,329.28 (3)                   | 29.395 (2)                          | 9.26 (4)         | 95 (1)             | 95 (1)                                             | 161 (3)                                          | 1.91 (2)                                    |
| 293.15             | 1,322.89 (4)                   | 29.067 (2)                          | 9.05 (3)         | 92.7 (6)           | 96 (2)                                             | 158 (2)                                          | 2.02 (6)                                    |
| 298.15             | 1,316.34 (1)                   | 28.740 (1)                          | 8.8 (1)          | 92.3 (8)           | 98 (1)                                             | 159 (2)                                          | 2.13 (2)                                    |
| 303.15             | 1,309.72 (4)                   | 28.409 (3)                          | 8.87 (6)         | 97 (2)             | 110 (5)                                            | 174 (7)                                          | 2.27 (4)                                    |
| 308.15             | 1,303.22 (3)                   | 28.082 (1)                          | 8.65 (7)         | 93 (2)             | 107 (2)                                            | 164 (4)                                          | 2.34 (5)                                    |
| 313.15             | 1,296.65 (7)                   | 27.755 (2)                          | 8.64 (6)         | 94 (1)             | 110 (1)                                            | 166 (2)                                          | 2.60 (3)                                    |
| 318.15             | 1,290.01 (6)                   | 27.431 (3)                          | 8.65 (6)         | 96.1 (9)           | 119 (2)                                            | 174 (2)                                          | 2.66 (4)                                    |
| 323.15             | 1,283.42 (9)                   | 27.106 (4)                          | 8.41 (6)         | 94 (2)             | 119 (3)                                            | 169 (4)                                          | 2.74 (2)                                    |
| 328.15             | 1,276.72 (4)                   | 26.779 (1)                          | 8.37 (4)         | 95.6 (7)           | 127 (3)                                            | 178 (3)                                          | 3.10 (5)                                    |
| 333.15             | 1,270.06 (8)                   | 26.457 (3)                          | 8.23 (6)         | 95 (1)             | 129 (3)                                            | 176 (4)                                          | 3.19 (6)                                    |
| 338.15             | 1,263.18 (4)                   | 26.130 (2)                          | 8.24 (7)         | 96 (1)             | 137 (3)                                            | 184 (4)                                          | 3.30 (5)                                    |
| 343.15             | 1,256.56 (5)                   | 25.807 (2)                          | 8.22 (3)         | 95.5 (1)           | 138 (1)                                            | 181 (1)                                          | 3.4 (1)                                     |
| 348.15             | 1,249.67 (9)                   | 25.482 (5)                          | 7.94 (5)         | 99.0 (7)           | 151 (4)                                            | 192 (4)                                          | 3.6 (1)                                     |
| 353.15             | 1,242.84 (4)                   | 25.158 (2)                          | 7.89 (8)         | 96 (1)             | 148 (4)                                            | 185 (4)                                          | 3.7 (1)                                     |
| 358.15             | 1,236.09 (4)                   | 24.835 (2)                          | 7.83 (7)         | 95 (1)             | 149 (3)                                            | 182 (4)                                          | 4.1 (1)                                     |
| 363.15             | 1,229.12 (4)                   | 24.511 (2)                          | 7.73 (3)         | 95 (2)             | 154 (7)                                            | 184 (7)                                          | 4.29 (8)                                    |
| 368.15             | 1,222.12 (7)                   | 24.186 (2)                          | 7.69 (5)         | 97 (2)             | 166 (5)                                            | 192 (6)                                          | 4.3 (1)                                     |
| 373.15             | 1,215.13 (5)                   | 23.865 (3)                          | 7.53 (3)         | 98 (2)             | 174 (4)                                            | 198 (4)                                          | 4.39 (3)                                    |

Table 5: Temperature dependent property data for the SPC water model with standard error of the last digit in parentheses

| Temperature<br>(K) | $\rho$<br>(kg/m <sup>3</sup> ) | $\Delta H_{\text{vap}}$<br>(kJ/mol) | $\varepsilon(0)$ | $C_p$<br>(J/mol·K) | $\kappa_T$<br>(10 <sup>5</sup> atm <sup>-1</sup> ) | $\alpha_p$<br>(10 <sup>6</sup> K <sup>-1</sup> ) | $D$<br>(10 <sup>-9</sup> m <sup>2</sup> /s) |
|--------------------|--------------------------------|-------------------------------------|------------------|--------------------|----------------------------------------------------|--------------------------------------------------|---------------------------------------------|
| 233.15             | 1,009.1 (1)                    | 41.873 (2)                          | 70 (1)           | 89.7 (4)           | 50 (1)                                             | 16 (1)                                           | 0.76 (1)                                    |
| 238.15             | 1,008.05 (2)                   | 41.470 (2)                          | 71 (2)           | 88.3 (8)           | 50.5 (4)                                           | 20 (2)                                           | 0.93 (2)                                    |
| 243.15             | 1,007.04 (8)                   | 41.065 (1)                          | 68.5 (9)         | 89.2 (6)           | 49.0 (4)                                           | 26 (3)                                           | 1.09 (1)                                    |
| 248.15             | 1,005.34 (9)                   | 40.665 (1)                          | 68.8 (6)         | 87 (1)             | 49.3 (6)                                           | 30 (3)                                           | 1.25 (2)                                    |
| 253.15             | 1,003.58 (6)                   | 40.270 (1)                          | 67 (1)           | 87 (1)             | 49.1 (7)                                           | 36.6 (9)                                         | 1.48 (3)                                    |
| 258.15             | 1,001.59 (6)                   | 39.875 (1)                          | 67 (2)           | 86.4 (5)           | 49.1 (4)                                           | 40 (1)                                           | 1.73 (2)                                    |
| 263.15             | 999.41 (7)                     | 39.484 (1)                          | 66.7 (9)         | 85.6 (4)           | 49.5 (8)                                           | 49 (2)                                           | 1.96 (3)                                    |
| 268.15             | 996.83 (5)                     | 39.1010 (6)                         | 67.7 (7)         | 84.3 (6)           | 50.0 (4)                                           | 51.4 (6)                                         | 2.19 (3)                                    |
| 273.15             | 994.16 (3)                     | 38.714 (2)                          | 66.9 (7)         | 84.9 (7)           | 50.9 (6)                                           | 59 (2)                                           | 2.43 (4)                                    |
| 278.15             | 991.34 (4)                     | 38.3319 (9)                         | 66.5 (6)         | 84.9 (4)           | 51.5 (7)                                           | 60.5 (7)                                         | 2.71 (5)                                    |
| 283.15             | 988.40 (3)                     | 37.949 (1)                          | 67.4 (6)         | 84.1 (1)           | 50.4 (4)                                           | 63 (3)                                           | 3.09 (4)                                    |
| 288.15             | 985.24 (5)                     | 37.5714 (5)                         | 66.9 (8)         | 83.3 (7)           | 52.7 (6)                                           | 68 (2)                                           | 3.20 (3)                                    |
| 293.15             | 981.84 (2)                     | 37.1933 (7)                         | 65.8 (3)         | 82.5 (3)           | 54.2 (9)                                           | 73 (2)                                           | 3.63 (7)                                    |
| 298.15             | 978.41 (3)                     | 36.820 (1)                          | 65.6 (2)         | 82.9 (3)           | 53.7 (5)                                           | 71.5 (7)                                         | 3.99 (1)                                    |
| 303.15             | 974.77 (5)                     | 36.445 (2)                          | 64.9 (7)         | 83.0 (6)           | 54.4 (2)                                           | 75 (2)                                           | 4.34 (4)                                    |
| 308.15             | 970.97 (3)                     | 36.074 (3)                          | 64.5 (9)         | 82.0 (3)           | 56.1 (6)                                           | 78 (3)                                           | 4.49 (7)                                    |
| 313.15             | 966.95 (3)                     | 35.701 (1)                          | 63.2 (5)         | 82.3 (5)           | 56 (1)                                             | 82 (2)                                           | 4.89 (9)                                    |
| 318.15             | 963.10 (4)                     | 35.3336 (8)                         | 63.1 (5)         | 81.5 (7)           | 58.4 (7)                                           | 86 (2)                                           | 5.45 (8)                                    |
| 323.15             | 958.81 (4)                     | 34.968 (1)                          | 63.1 (5)         | 81.7 (3)           | 58 (1)                                             | 86 (2)                                           | 5.79 (4)                                    |
| 328.15             | 954.56 (2)                     | 34.598 (1)                          | 61.9 (4)         | 81.8 (4)           | 61.5 (7)                                           | 91.9 (7)                                         | 6.33 (9)                                    |
| 333.15             | 950.17 (2)                     | 34.233 (2)                          | 61.6 (3)         | 81.1 (4)           | 61.6 (8)                                           | 95 (1)                                           | 6.6 (2)                                     |
| 338.15             | 945.69 (4)                     | 33.866 (1)                          | 60.8 (4)         | 81.9 (7)           | 63 (1)                                             | 99 (3)                                           | 7.09 (8)                                    |
| 343.15             | 941.00 (3)                     | 33.499 (2)                          | 60.9 (4)         | 82.3 (6)           | 67.9 (8)                                           | 106 (2)                                          | 7.57 (9)                                    |
| 348.15             | 936.21 (3)                     | 33.135 (1)                          | 60.9 (3)         | 80.8 (4)           | 65 (2)                                             | 101 (3)                                          | 7.99 (5)                                    |
| 353.15             | 931.38 (6)                     | 32.771 (1)                          | 59.9 (3)         | 80.2 (6)           | 70 (1)                                             | 108 (3)                                          | 8.6 (1)                                     |
| 358.15             | 926.32 (6)                     | 32.403 (2)                          | 59.8 (4)         | 81.8 (4)           | 70.8 (5)                                           | 109 (1)                                          | 8.9 (3)                                     |
| 363.15             | 921.22 (5)                     | 32.039 (1)                          | 57.9 (3)         | 81.8 (9)           | 74 (1)                                             | 117 (2)                                          | 9.6 (1)                                     |
| 368.15             | 915.96 (6)                     | 31.673 (2)                          | 58.0 (1)         | 81.3 (3)           | 76 (2)                                             | 116 (3)                                          | 9.9 (1)                                     |
| 373.15             | 910.65 (3)                     | 31.311 (2)                          | 57.4 (4)         | 82.1 (7)           | 79 (2)                                             | 124 (3)                                          | 10.8 (2)                                    |



Table 6: Temperature dependent property data for the SPC/E water model with standard error of the last digit in parentheses

| Temperature<br>(K) | $\rho$<br>(kg/m <sup>3</sup> ) | $\Delta H_{\text{vap}}$<br>(kJ/mol) | $\varepsilon(0)$ | $C_p$<br>(J/mol·K) | $\kappa_T$<br>(10 <sup>5</sup> atm <sup>-1</sup> ) | $\alpha_p$<br>(10 <sup>6</sup> K <sup>-1</sup> ) | $D$<br>(10 <sup>-9</sup> m <sup>2</sup> /s) |           |
|--------------------|--------------------------------|-------------------------------------|------------------|--------------------|----------------------------------------------------|--------------------------------------------------|---------------------------------------------|-----------|
| 233.15             | 1,011.4 (2)                    | 47.295 (5)                          | 71 (1)           | 23.2 (3)           | 97 (1)                                             | 45.5 (5)                                         | -22 (4)                                     | 0.238 (5) |
| 238.15             | 1,012.7 (1)                    | 46.839 (5)                          | 70 (1)           | 95.9 (8)           | 45.5 (9)                                           | -12 (2)                                          | 0.345 (2)                                   |           |
| 243.15             | 1,013.0 (2)                    | 46.416 (3)                          | 74 (1)           | 94.7 (7)           | 44.1 (4)                                           | -7 (1)                                           | 0.419 (6)                                   |           |
| 248.15             | 1,013.2 (1)                    | 45.985 (2)                          | 75 (3)           | 92.6 (7)           | 46.2 (5)                                           | 2 (2)                                            | 0.54 (1)                                    |           |
| 253.15             | 1,012.98 (6)                   | 45.562 (2)                          | 71 (1)           | 93.2 (5)           | 46.2 (8)                                           | 7 (1)                                            | 0.68 (1)                                    |           |
| 258.15             | 1,012.68 (2)                   | 45.137 (1)                          | 74 (1)           | 91.6 (4)           | 44.8 (7)                                           | 14 (2)                                           | 0.82 (1)                                    |           |
| 263.15             | 1,011.60 (3)                   | 44.722 (2)                          | 71.5 (9)         | 90.5 (9)           | 44.0 (4)                                           | 18 (2)                                           | 0.97 (2)                                    |           |
| 268.15             | 1,010.81 (7)                   | 44.309 (2)                          | 71 (1)           | 90.6 (5)           | 44.6 (4)                                           | 24 (3)                                           | 1.14 (1)                                    |           |
| 273.15             | 1,009.4 (1)                    | 43.907 (1)                          | 73 (1)           | 89.9 (7)           | 45.2 (5)                                           | 28 (3)                                           | 1.31 (1)                                    |           |
| 278.15             | 1,007.78 (4)                   | 43.491 (2)                          | 73.0 (8)         | 88.9 (5)           | 44.4 (4)                                           | 34 (1)                                           | 1.51 (3)                                    |           |
| 283.15             | 1,006.09 (9)                   | 43.093 (2)                          | 72.9 (6)         | 88.7 (7)           | 45.9 (2)                                           | 40 (1)                                           | 1.73 (3)                                    |           |
| 288.15             | 1,004.07 (6)                   | 42.697 (2)                          | 70.8 (5)         | 87.8 (5)           | 46.1 (7)                                           | 40 (2)                                           | 2.00 (2)                                    |           |
| 293.15             | 1,001.89 (3)                   | 42.299 (2)                          | 71.5 (5)         | 87.0 (7)           | 45.4 (3)                                           | 44 (2)                                           | 2.21 (5)                                    |           |
| 298.15             | 999.53 (2)                     | 41.905 (1)                          | 71.1 (1)         | 86.3 (2)           | 46.1 (2)                                           | 49.1 (4)                                         | 2.456 (3)                                   |           |
| 303.15             | 996.95 (7)                     | 41.512 (2)                          | 70.3 (3)         | 86.2 (4)           | 47.2 (5)                                           | 54 (2)                                           | 2.72 (4)                                    |           |
| 308.15             | 994.16 (5)                     | 41.125 (2)                          | 69.4 (4)         | 85.2 (7)           | 47.6 (6)                                           | 56 (2)                                           | 2.97 (9)                                    |           |
| 313.15             | 991.32 (4)                     | 40.736 (2)                          | 70.8 (9)         | 85.5 (5)           | 47.4 (7)                                           | 58 (1)                                           | 3.37 (6)                                    |           |
| 318.15             | 988.28 (4)                     | 40.353 (2)                          | 69.4 (5)         | 84.8 (3)           | 48.9 (5)                                           | 62.3 (5)                                         | 3.66 (5)                                    |           |
| 323.15             | 985.16 (3)                     | 39.967 (2)                          | 69.9 (6)         | 83.5 (5)           | 50.0 (7)                                           | 65 (2)                                           | 3.92 (5)                                    |           |
| 328.15             | 981.83 (7)                     | 39.592 (1)                          | 68.3 (5)         | 84.6 (4)           | 50.6 (8)                                           | 67 (2)                                           | 4.20 (5)                                    |           |
| 333.15             | 978.39 (7)                     | 39.210 (1)                          | 69.0 (5)         | 83.3 (3)           | 50.4 (5)                                           | 70 (1)                                           | 4.60 (6)                                    |           |
| 338.15             | 974.84 (4)                     | 38.831 (1)                          | 67.7 (6)         | 83.4 (4)           | 53.1 (6)                                           | 78 (1)                                           | 5.00 (7)                                    |           |
| 343.15             | 971.14 (5)                     | 38.455 (2)                          | 68.3 (5)         | 83.1 (7)           | 54.0 (7)                                           | 79 (1)                                           | 5.36 (8)                                    |           |
| 348.15             | 967.36 (4)                     | 38.0788 (9)                         | 67.0 (6)         | 84.7 (8)           | 54.6 (5)                                           | 82 (2)                                           | 5.59 (5)                                    |           |
| 353.15             | 963.37 (3)                     | 37.707 (2)                          | 66.5 (8)         | 82.7 (7)           | 55 (1)                                             | 83 (4)                                           | 6.0 (1)                                     |           |
| 358.15             | 959.35 (3)                     | 37.332 (1)                          | 65.7 (6)         | 83.4 (5)           | 57 (1)                                             | 87 (2)                                           | 6.27 (8)                                    |           |
| 363.15             | 955.19 (5)                     | 36.963 (2)                          | 65.6 (7)         | 83.0 (8)           | 59 (1)                                             | 89 (2)                                           | 6.83 (7)                                    |           |
| 368.15             | 950.91 (4)                     | 36.587 (1)                          | 64.6 (3)         | 82.2 (3)           | 58 (1)                                             | 90 (1)                                           | 7.4 (1)                                     |           |
| 373.15             | 946.56 (4)                     | 36.2192 (9)                         | 64.4 (7)         | 82.1 (6)           | 62.7 (5)                                           | 96 (1)                                           | 7.4 (1)                                     |           |

Table 7: Temperature dependent property data for the SPC/DC water model with standard error of the last digit in parentheses

| Temperature<br>(K) | $\rho$<br>(kg/m <sup>3</sup> ) | $\Delta H_{\text{vap}}$<br>(kJ/mol) | $\varepsilon(0)$ | $C_p$<br>(J/mol·K) | $\kappa_T$<br>(10 <sup>5</sup> atm <sup>-1</sup> ) | $\alpha_p$<br>(10 <sup>6</sup> K <sup>-1</sup> ) | $D$<br>(10 <sup>-9</sup> m <sup>2</sup> /s) |           |
|--------------------|--------------------------------|-------------------------------------|------------------|--------------------|----------------------------------------------------|--------------------------------------------------|---------------------------------------------|-----------|
| 233.15             | 1,016.3 (1)                    | 49.044 (2)                          | 82 (2)           | 21.4 (2)           | 89.5 (8)                                           | 49.6 (7)                                         | -3 (2)                                      | 0.344 (5) |
| 238.15             | 1,016.69 (8)                   | 48.638 (3)                          | 80 (4)           | 88.3 (8)           | 49.8 (5)                                           | -3 (3)                                           | 0.438 (9)                                   |           |
| 243.15             | 1,016.2 (2)                    | 48.236 (3)                          | 81 (2)           | 87.6 (8)           | 47.9 (6)                                           | 8 (2)                                            | 0.54 (1)                                    |           |
| 248.15             | 1,015.6 (1)                    | 47.841 (3)                          | 83 (3)           | 86.3 (4)           | 46.6 (7)                                           | 9 (1)                                            | 0.645 (9)                                   |           |
| 253.15             | 1,014.70 (4)                   | 47.452 (2)                          | 79.2 (8)         | 87.3 (5)           | 46.0 (2)                                           | 14 (2)                                           | 0.769 (9)                                   |           |
| 258.15             | 1,013.74 (8)                   | 47.054 (1)                          | 79.5 (9)         | 86.9 (3)           | 46.7 (3)                                           | 25 (2)                                           | 0.92 (1)                                    |           |
| 263.15             | 1,012.51 (5)                   | 46.663 (2)                          | 79 (1)           | 85.9 (7)           | 44.2 (4)                                           | 24 (1)                                           | 1.08 (2)                                    |           |
| 268.15             | 1,010.94 (4)                   | 46.279 (2)                          | 82 (1)           | 85.1 (7)           | 43.9 (5)                                           | 30.2 (7)                                         | 1.25 (2)                                    |           |
| 273.15             | 1,009.33 (8)                   | 45.8941 (5)                         | 80 (2)           | 84.7 (4)           | 43.4 (2)                                           | 34.7 (4)                                         | 1.44 (2)                                    |           |
| 278.15             | 1,007.53 (4)                   | 45.505 (1)                          | 78 (2)           | 85.2 (7)           | 42.8 (4)                                           | 37 (2)                                           | 1.62 (3)                                    |           |
| 283.15             | 1,005.46 (3)                   | 45.127 (2)                          | 79 (2)           | 83.5 (5)           | 43.2 (3)                                           | 39 (1)                                           | 1.84 (2)                                    |           |
| 288.15             | 1,003.32 (8)                   | 44.7459 (9)                         | 78.0 (4)         | 84.6 (6)           | 43.6 (5)                                           | 46 (1)                                           | 2.08 (3)                                    |           |
| 293.15             | 1,001.15 (4)                   | 44.370 (3)                          | 77.2 (7)         | 81.9 (6)           | 42.8 (5)                                           | 43 (1)                                           | 2.26 (3)                                    |           |
| 298.15             | 998.69 (2)                     | 43.993 (0)                          | 78.3 (6)         | 83.2 (3)           | 43.7 (3)                                           | 48.8 (9)                                         | 2.48 (1)                                    |           |
| 303.15             | 996.15 (4)                     | 43.623 (1)                          | 77.7 (6)         | 83.4 (6)           | 44.4 (3)                                           | 55 (2)                                           | 2.67 (4)                                    |           |
| 308.15             | 993.44 (4)                     | 43.251 (1)                          | 76 (1)           | 82.5 (7)           | 44.6 (6)                                           | 57 (2)                                           | 3.02 (8)                                    |           |
| 313.15             | 990.70 (4)                     | 42.879 (2)                          | 76.9 (6)         | 82.1 (2)           | 45.1 (6)                                           | 57.3 (7)                                         | 3.26 (9)                                    |           |
| 318.15             | 987.80 (2)                     | 42.508 (2)                          | 76.0 (5)         | 82.0 (6)           | 43.8 (6)                                           | 58 (2)                                           | 3.62 (3)                                    |           |
| 323.15             | 984.80 (3)                     | 42.141 (1)                          | 76.0 (9)         | 81.4 (6)           | 45.9 (6)                                           | 62.2 (7)                                         | 3.82 (3)                                    |           |
| 328.15             | 981.63 (4)                     | 41.7773 (8)                         | 75.3 (8)         | 81.4 (5)           | 45.8 (7)                                           | 63 (1)                                           | 4.06 (7)                                    |           |
| 333.15             | 978.45 (6)                     | 41.413 (2)                          | 76.0 (8)         | 80.6 (5)           | 47 (1)                                             | 66 (2)                                           | 4.48 (9)                                    |           |
| 338.15             | 975.19 (2)                     | 41.047 (2)                          | 74.1 (3)         | 80.3 (8)           | 47.8 (9)                                           | 69 (2)                                           | 4.77 (8)                                    |           |
| 343.15             | 971.71 (4)                     | 40.6832 (8)                         | 74.8 (5)         | 81 (1)             | 48.9 (3)                                           | 72 (1)                                           | 5.1 (1)                                     |           |
| 348.15             | 968.24 (3)                     | 40.322 (1)                          | 73.8 (2)         | 80.4 (6)           | 51 (1)                                             | 75 (3)                                           | 5.5 (1)                                     |           |
| 353.15             | 964.79 (6)                     | 39.9640 (9)                         | 73.5 (5)         | 80.6 (4)           | 51.5 (8)                                           | 77 (1)                                           | 5.8 (1)                                     |           |
| 358.15             | 961.12 (5)                     | 39.601 (1)                          | 73.3 (4)         | 80.0 (6)           | 52.3 (9)                                           | 82 (2)                                           | 6.32 (8)                                    |           |
| 363.15             | 957.33 (5)                     | 39.240 (2)                          | 72.0 (7)         | 80.0 (3)           | 51.3 (5)                                           | 78 (2)                                           | 6.6 (1)                                     |           |
| 368.15             | 953.50 (2)                     | 38.882 (2)                          | 72.3 (2)         | 80.6 (6)           | 51.9 (6)                                           | 81 (1)                                           | 6.9 (1)                                     |           |
| 373.15             | 949.62 (4)                     | 38.525 (2)                          | 70.6 (5)         | 80.0 (4)           | 54 (1)                                             | 82.3 (9)                                         | 7.27 (4)                                    |           |

Table 8: Temperature dependent property data for the H<sub>2</sub>O-DC water model with standard error of the last digit in parentheses

| Temperature<br>(K) | $\rho$<br>(kg/m <sup>3</sup> ) | $\Delta H_{\text{vap}}$<br>(kJ/mol) | $\varepsilon(0)$ | $C_p$<br>(J/mol·K) | $\kappa_T$<br>(10 <sup>5</sup> atm <sup>-1</sup> ) | $\alpha_p$<br>(10 <sup>6</sup> K <sup>-1</sup> ) | $D$<br>(10 <sup>-9</sup> m <sup>2</sup> /s) |
|--------------------|--------------------------------|-------------------------------------|------------------|--------------------|----------------------------------------------------|--------------------------------------------------|---------------------------------------------|
| 233.15             | 1005.5 (1)                     | 48.903 (7)                          | 82.9 (8)         | 96 (1)             | 43.0 (2)                                           | -29 (3)                                          | 0.154 (5)                                   |
| 238.15             | 1006.7 (2)                     | 48.447 (4)                          | 79 (6)           | 97 (2)             | 45 (1)                                             | -22 (4)                                          | 0.214 (5)                                   |
| 243.15             | 1007.7 (1)                     | 48.001 (4)                          | 80 (2)           | 97 (2)             | 44.5 (7)                                           | -12 (3)                                          | 0.297 (5)                                   |
| 248.15             | 1008.0 (2)                     | 47.556 (4)                          | 76 (1)           | 97.4 (9)           | 43.6 (6)                                           | -14 (4)                                          | 0.385 (7)                                   |
| 253.15             | 1008.4 (1)                     | 47.115 (2)                          | 79 (2)           | 94 (1)             | 43.6 (4)                                           | -4 (3)                                           | 0.499 (8)                                   |
| 258.15             | 1008.4 (1)                     | 46.684 (2)                          | 79 (1)           | 93.2 (5)           | 43.3 (8)                                           | 8 (2)                                            | 0.64 (1)                                    |
| 263.15             | 1008.03 (7)                    | 46.246 (1)                          | 77 (2)           | 94.9 (8)           | 43.5 (7)                                           | 9 (2)                                            | 0.77 (1)                                    |
| 268.15             | 1007.20 (4)                    | 45.826 (3)                          | 79.3 (6)         | 94.9 (5)           | 43 (1)                                             | 14 (1)                                           | 0.95 (1)                                    |
| 273.15             | 1006.21 (5)                    | 45.406 (2)                          | 79 (2)           | 91.5 (6)           | 44.1 (4)                                           | 22 (1)                                           | 1.14 (2)                                    |
| 278.15             | 1004.83 (4)                    | 44.990 (2)                          | 78 (2)           | 90.9 (4)           | 43.8 (3)                                           | 25 (2)                                           | 1.31 (3)                                    |
| 283.15             | 1003.45 (4)                    | 44.580 (3)                          | 78 (1)           | 90.6 (6)           | 44.4 (8)                                           | 35 (2)                                           | 1.49 (2)                                    |
| 288.15             | 1001.66 (3)                    | 44.171 (1)                          | 77 (1)           | 89.9 (4)           | 44.4 (8)                                           | 36 (1)                                           | 1.73 (3)                                    |
| 293.15             | 999.69 (5)                     | 43.766 (1)                          | 79.8 (7)         | 88.2 (8)           | 43.8 (3)                                           | 41 (2)                                           | 1.96 (4)                                    |
| 298.15             | 997.55 (2)                     | 43.366 (1)                          | 78.7 (6)         | 87.8 (2)           | 45.0 (2)                                           | 44.8 (4)                                         | 2.17 (1)                                    |
| 303.15             | 995.20 (5)                     | 42.966 (2)                          | 78 (2)           | 88.0 (8)           | 45.9 (6)                                           | 48.2 (6)                                         | 2.45 (2)                                    |
| 308.15             | 992.70 (3)                     | 42.570 (2)                          | 78.2 (8)         | 86.7 (8)           | 45.9 (7)                                           | 52 (2)                                           | 2.69 (3)                                    |
| 313.15             | 990.08 (4)                     | 42.181 (2)                          | 77.0 (7)         | 85.4 (9)           | 47.6 (4)                                           | 56 (2)                                           | 2.96 (4)                                    |
| 318.15             | 987.20 (4)                     | 41.788 (2)                          | 77 (1)           | 85.6 (6)           | 48.3 (7)                                           | 60 (2)                                           | 3.24 (5)                                    |
| 323.15             | 984.26 (3)                     | 41.401 (1)                          | 77.3 (9)         | 86.4 (4)           | 48.3 (8)                                           | 63 (2)                                           | 3.61 (7)                                    |
| 328.15             | 981.14 (3)                     | 41.014 (2)                          | 76.2 (6)         | 85 (1)             | 48.5 (6)                                           | 63 (2)                                           | 3.76 (6)                                    |
| 333.15             | 977.93 (4)                     | 40.630 (2)                          | 76.9 (8)         | 85.1 (7)           | 49.9 (7)                                           | 67 (2)                                           | 4.29 (5)                                    |
| 338.15             | 974.63 (1)                     | 40.248 (1)                          | 75.4 (9)         | 84.7 (6)           | 51.0 (8)                                           | 70 (2)                                           | 4.47 (4)                                    |
| 343.15             | 971.03 (5)                     | 39.869 (1)                          | 74.4 (8)         | 84.7 (5)           | 52.4 (6)                                           | 75 (2)                                           | 4.98 (3)                                    |
| 348.15             | 967.41 (3)                     | 39.490 (2)                          | 73.8 (7)         | 82.8 (9)           | 51.5 (7)                                           | 71 (2)                                           | 5.20 (8)                                    |
| 353.15             | 963.61 (2)                     | 39.110 (2)                          | 73.2 (8)         | 83.2 (1)           | 53.9 (6)                                           | 77 (1)                                           | 5.59 (5)                                    |
| 358.15             | 959.71 (6)                     | 38.737 (1)                          | 73.1 (4)         | 83.4 (7)           | 56 (1)                                             | 83 (3)                                           | 6.03 (8)                                    |
| 363.15             | 955.73 (4)                     | 38.360 (1)                          | 73.3 (8)         | 82.4 (3)           | 58.9 (6)                                           | 85 (1)                                           | 6.33 (2)                                    |
| 368.15             | 951.64 (5)                     | 37.984 (2)                          | 72.2 (3)         | 82.7 (7)           | 57 (2)                                             | 87 (3)                                           | 6.74 (8)                                    |
| 373.15             | 947.44 (4)                     | 37.614 (1)                          | 71.9 (7)         | 82.8 (3)           | 59.0 (8)                                           | 88 (2)                                           | 7.23 (3)                                    |
